# Supplementary material for: Evaluation of a Pooled Strategy for High-Throughput Sequencing of Cosmid Clones from Metagenomic Libraries
Source: PLoS One. 2014 Jun 9;9(6):e98968. doi: 10.1371/journal.pone.0098968 (PMC4049660; doi:10.1371/journal.pone.0098968)
Supplement: Table S6 — Clone type classification. 73 clones classified as Clone Type A, B, C, or D. Type descriptions are as follows. Type A: end-tags retrieved same contig from pool. Type B: end-tags retrieved two different contigs from the pool but both contigs belong to same clone. Type C: only one of the two end-tags retrieved a contig from the pool. Type D: single end-tag retrieved one contig from pool. (XLSX) [file pone.0098968.s009.xlsx]

## Sheet: Sheet1
Count	Clone	Clone Type
1	BF4	B
2	BT2	A
3	Cel-1	B
4	Cel-32-1	B
5	Cel-3-22-2	B
6	Cel-60-1	B
7	CM-111	D
8	CM-123	A
9	CM-129	A
10	CM-130	A
11	CM-136	A
12	cm18	C
13	CM-18	A
14	CM-19	D
15	CM-2	C
16	Cm26	B
17	Cm3	D
18	Cm30	B
19	CM-31	D
20	CM-4	D
21	cm42	B
22	CM-69	C
23	CM-92	A
24	CX4s17	D
25	CX4s8	B
26	CX6-4	C
27	CX9-10	B
28	CX9s4	B
29	Km-1	C
30	lac-ec1	C
31	lac-ec104	D
32	lac111	C
33	lac121	B
34	lac-ec123	C
35	lac127	B
36	lac13	A
37	lac146	B
38	lac153	B
39	lac16	A
40	lac160	A
41	lac161	A
42	lac170	B
43	lac193	A
44	lac20	B
45	lac24B	C
46	lac27B	C
47	lac35B	C
48	lac36W	A
49	lac55	A
50	lac71	B
51	lac82	D
52	lac84	A
53	MEL125	B
54	MEL126	B
55	PO3	A
56	RCX18	B
57	RCX2	B
58	RCX24	A
59	RCX25	D
60	RCX28	B
61	RCX31	A
62	RCX32	B
63	RCX6	D
64	RCX7	D
65	RCX8	A
66	RCX9	D
67	RCX92	A
68	PCX9M1	A
69	PCX9M3	B
70	PCX9M5	B
71	Xyl 2	B
72	Xyl 3	B
73	Xyl 4	A
A	end-tags retrieved same contig from pool
B	end-tags retrieved different contig from pool but both contigs belong to same clone
C	only one of the two end-tags retrieved a contig from the pool
D	single end-tag retrieved a contig from pool
